# Supplementary material for: Monitoring the Shelf Life of Refined Vegetable Oils under Market Storage Conditions—A Kinetic Chemofoodmetric Approach
Source: MDPI journal article supplement (doi:10.3390/molecules27196508), 2022-10-02
Supplement: s1 [file s1]

Table S1. Raw data obtained in the fatty acid profile analysis by GC-FID chromatography at the beginning of the study for all the oil samples.

*S- sunflower oil*

*G- grapeseed oil*

*R- rapeseed oil*

*C- corn oil*

*B- Blend oil*

*P- pomace oil*

*O- Olive oil*

| Code  | Lauric | Miristic | Palmitic | Palmitoleic | Margaric | Margaroleic | Esteáric | Oleic | Linoleic | Ararquic | Linolenic | Gadoleic | Behenic | Erucic | C22:2 | Lignoceric | Nervonic |
|-------|--------|----------|----------|-------------|----------|-------------|----------|-------|----------|----------|-----------|----------|---------|--------|-------|------------|----------|
| S-003 | 0.00   | 0.07     | 5.93     | 0.11        | 0.04     | 0.03        | 3.22     | 33.44 | 55.71    | 0.24     | 0.06      | 0.15     | 0.73    | 0.00   | 0.00  | 0.27       | 0.00     |
| S-004 | 0.00   | 0.04     | 4.09     | 0.15        | 0.03     | 0.04        | 3.17     | 80.03 | 10.45    | 0.31     | 0.05      | 0.27     | 0.97    | 0.01   | 0.01  | 0.36       | 0.01     |
| S-009 | 0.00   | 0.07     | 6.45     | 0.14        | 0.04     | 0.03        | 3.84     | 27.56 | 60.35    | 0.29     | 0.11      | 0.13     | 0.71    | 0.00   | 0.00  | 0.28       | 0.01     |
| S-017 | 0.00   | 0.06     | 5.84     | 0.13        | 0.03     | 0.04        | 3.38     | 33.44 | 55.56    | 0.26     | 0.06      | 0.15     | 0.75    | 0.00   | 0.00  | 0.29       | 0.01     |

|       |      |      |      |      |      |      |      |       |       |      |      |      |      |      |      |      |      |
|-------|------|------|------|------|------|------|------|-------|-------|------|------|------|------|------|------|------|------|
| S-021 | 0.00 | 0.07 | 6.01 | 0.12 | 0.03 | 0.03 | 3.60 | 30.08 | 58.53 | 0.28 | 0.06 | 0.15 | 0.74 | 0.00 | 0.00 | 0.31 | 0.00 |
| S-024 | 0.00 | 0.06 | 5.80 | 0.12 | 0.04 | 0.03 | 3.64 | 33.56 | 55.08 | 0.29 | 0.11 | 0.18 | 0.71 | 0.00 | 0.00 | 0.37 | 0.01 |
| S-025 | 0.00 | 0.04 | 4.00 | 0.16 | 0.03 | 0.04 | 2.99 | 82.48 | 8.35  | 0.29 | 0.05 | 0.27 | 0.92 | 0.01 | 0.00 | 0.35 | 0.01 |
| S-027 | 0.00 | 0.06 | 5.90 | 0.10 | 0.03 | 0.03 | 3.38 | 31.08 | 57.83 | 0.26 | 0.09 | 0.16 | 0.77 | 0.00 | 0.00 | 0.31 | 0.00 |
| S-029 | 0.00 | 0.07 | 6.10 | 0.13 | 0.04 | 0.03 | 3.62 | 29.37 | 59.02 | 0.28 | 0.07 | 0.18 | 0.76 | 0.00 | 0.00 | 0.33 | 0.00 |
| S-039 | 0.00 | 0.07 | 6.04 | 0.13 | 0.03 | 0.03 | 3.39 | 31.36 | 57.41 | 0.27 | 0.06 | 0.15 | 0.73 | 0.00 | 0.00 | 0.32 | 0.00 |
| S-040 | 0.00 | 0.07 | 6.32 | 0.14 | 0.03 | 0.03 | 3.23 | 30.61 | 57.96 | 0.27 | 0.06 | 0.16 | 0.75 | 0.00 | 0.00 | 0.36 | 0.00 |
| S-041 | 0.00 | 0.06 | 5.99 | 0.13 | 0.03 | 0.03 | 3.27 | 32.65 | 56.23 | 0.26 | 0.06 | 0.17 | 0.75 | 0.00 | 0.00 | 0.34 | 0.01 |
| S-042 | 0.00 | 0.05 | 5.00 | 0.17 | 0.03 | 0.04 | 3.07 | 65.42 | 24.34 | 0.29 | 0.05 | 0.24 | 0.89 | 0.01 | 0.00 | 0.40 | 0.01 |
| S-043 | 0.00 | 0.07 | 6.40 | 0.14 | 0.03 | 0.03 | 3.21 | 30.41 | 58.08 | 0.26 | 0.11 | 0.16 | 0.77 | 0.01 | 0.00 | 0.32 | 0.00 |
| S-045 | 0.00 | 0.07 | 6.25 | 0.15 | 0.03 | 0.03 | 3.20 | 31.94 | 56.82 | 0.25 | 0.07 | 0.15 | 0.69 | 0.00 | 0.00 | 0.33 | 0.00 |
| S-049 | 0.00 | 0.07 | 6.71 | 0.16 | 0.04 | 0.03 | 3.84 | 28.44 | 59.14 | 0.29 | 0.08 | 0.14 | 0.72 | 0.01 | 0.00 | 0.32 | 0.01 |
| S-050 | 0.00 | 0.07 | 6.21 | 0.14 | 0.03 | 0.03 | 3.11 | 30.39 | 58.46 | 0.25 | 0.07 | 0.17 | 0.71 | 0.00 | 0.00 | 0.36 | 0.01 |
| S-051 | 0.00 | 0.08 | 6.79 | 0.17 | 0.03 | 0.03 | 3.05 | 30.66 | 57.62 | 0.26 | 0.06 | 0.18 | 0.69 | 0.00 | 0.00 | 0.37 | 0.00 |
| S-053 | 0.00 | 0.06 | 6.28 | 0.12 | 0.04 | 0.03 | 3.64 | 30.90 | 57.26 | 0.29 | 0.07 | 0.15 | 0.82 | 0.00 | 0.00 | 0.35 | 0.00 |
| S-054 | 0.00 | 0.07 | 6.20 | 0.13 | 0.03 | 0.03 | 3.13 | 30.41 | 58.45 | 0.25 | 0.06 | 0.15 | 0.71 | 0.00 | 0.00 | 0.36 | 0.00 |
| S-055 | 0.00 | 0.07 | 6.10 | 0.13 | 0.03 | 0.03 | 3.18 | 30.70 | 58.14 | 0.26 | 0.07 | 0.18 | 0.74 | 0.00 | 0.00 | 0.37 | 0.00 |
| S-    | 0.00 | 0.04 | 4.39 | 0.17 | 0.03 | 0.05 | 3.20 | 76.98 | 13.16 | 0.33 | 0.11 | 0.24 | 0.92 | 0.01 | 0.00 | 0.35 | 0.01 |

|       |      |      |       |      |      |      |      |       |       |      |      |      |      |      |      |      |      |
|-------|------|------|-------|------|------|------|------|-------|-------|------|------|------|------|------|------|------|------|
| 056   |      |      |       |      |      |      |      |       |       |      |      |      |      |      |      |      |      |
| S-057 | 0.00 | 0.06 | 5.84  | 0.10 | 0.03 | 0.03 | 3.31 | 32.93 | 56.09 | 0.26 | 0.12 | 0.16 | 0.76 | 0.01 | 0.00 | 0.30 | 0.01 |
| S-060 | 0.00 | 0.07 | 5.83  | 0.13 | 0.03 | 0.03 | 3.17 | 34.30 | 54.82 | 0.25 | 0.06 | 0.16 | 0.73 | 0.00 | 0.00 | 0.42 | 0.00 |
| S-061 | 0.00 | 0.06 | 5.74  | 0.12 | 0.03 | 0.03 | 3.00 | 34.24 | 54.48 | 0.25 | 0.07 | 0.17 | 0.72 | 0.18 | 0.00 | 0.62 | 0.29 |
| S-070 | 0.00 | 0.05 | 7.51  | 0.17 | 0.00 | 0.00 | 3.68 | 26.38 | 61.29 | 0.18 | 0.06 | 0.06 | 0.46 | 0.00 | 0.00 | 0.16 | 0.00 |
| S-071 | 0.00 | 0.08 | 6.71  | 0.16 | 0.03 | 0.03 | 3.20 | 31.84 | 56.32 | 0.27 | 0.06 | 0.16 | 0.73 | 0.00 | 0.00 | 0.39 | 0.00 |
| S-072 | 0.00 | 0.07 | 6.12  | 0.12 | 0.03 | 0.03 | 3.34 | 31.43 | 57.34 | 0.26 | 0.10 | 0.16 | 0.72 | 0.00 | 0.00 | 0.28 | 0.00 |
| S-073 | 0.00 | 0.08 | 6.08  | 0.13 | 0.04 | 0.04 | 3.41 | 31.53 | 57.19 | 0.27 | 0.09 | 0.16 | 0.72 | 0.00 | 0.00 | 0.28 | 0.00 |
| G-022 | 0.00 | 0.04 | 6.85  | 0.13 | 0.06 | 0.03 | 4.37 | 20.02 | 67.65 | 0.21 | 0.36 | 0.17 | 0.05 | 0.00 | 0.00 | 0.05 | 0.00 |
| R-023 | 0.01 | 0.04 | 4.47  | 0.22 | 0.05 | 0.06 | 1.83 | 60.38 | 23.31 | 0.56 | 7.29 | 1.10 | 0.36 | 0.05 | 0.00 | 0.14 | 0.12 |
| C-052 | 0.00 | 0.03 | 11.00 | 0.13 | 0.06 | 0.03 | 2.09 | 30.50 | 54.07 | 0.51 | 0.88 | 0.27 | 0.20 | 0.01 | 0.00 | 0.22 | 0.00 |
| C-058 | 0.00 | 0.03 | 10.68 | 0.13 | 0.06 | 0.03 | 1.96 | 31.04 | 54.04 | 0.49 | 0.87 | 0.27 | 0.17 | 0.01 | 0.00 | 0.21 | 0.00 |
| C-059 | 0.00 | 0.03 | 10.65 | 0.13 | 0.06 | 0.03 | 2.02 | 30.46 | 54.38 | 0.49 | 1.03 | 0.28 | 0.19 | 0.01 | 0.00 | 0.21 | 0.00 |
| C-067 | 0.00 | 0.03 | 11.41 | 0.16 | 0.07 | 0.04 | 1.93 | 30.74 | 53.44 | 0.51 | 0.97 | 0.28 | 0.17 | 0.00 | 0.00 | 0.24 | 0.00 |
| B-001 | 0.00 | 0.06 | 5.15  | 0.16 | 0.04 | 0.04 | 3.05 | 51.72 | 36.30 | 0.33 | 1.67 | 0.41 | 0.73 | 0.05 | 0.00 | 0.26 | 0.03 |
| B-047 | 0.42 | 0.22 | 7.50  | 0.50 | 0.05 | 0.08 | 2.93 | 69.42 | 16.98 | 0.39 | 0.30 | 0.29 | 0.63 | 0.01 | 0.00 | 0.28 | 0.00 |
| B-048 | 0.00 | 0.07 | 6.21  | 0.16 | 0.03 | 0.04 | 3.22 | 36.10 | 52.23 | 0.29 | 0.34 | 0.24 | 0.68 | 0.01 | 0.00 | 0.35 | 0.01 |
| B-068 | 0.01 | 0.07 | 6.90  | 0.12 | 0.04 | 0.03 | 3.12 | 32.72 | 54.47 | 0.26 | 1.17 | 0.17 | 0.64 | 0.00 | 0.00 | 0.28 | 0.00 |

|       |      |      |       |      |      |      |      |       |       |      |      |      |      |      |      |      |      |
|-------|------|------|-------|------|------|------|------|-------|-------|------|------|------|------|------|------|------|------|
| O-013 | 0.00 | 0.01 | 12.24 | 1.21 | 0.06 | 0.10 | 3.36 | 73.46 | 8.02  | 0.44 | 0.67 | 0.23 | 0.12 | 0.00 | 0.00 | 0.07 | 0.00 |
| O-018 | 0.00 | 0.01 | 11.86 | 1.11 | 0.09 | 0.16 | 2.77 | 75.29 | 7.09  | 0.45 | 0.71 | 0.28 | 0.12 | 0.00 | 0.00 | 0.06 | 0.00 |
| O-019 | 0.00 | 0.01 | 13.51 | 1.45 | 0.07 | 0.11 | 3.08 | 69.49 | 10.69 | 0.47 | 0.69 | 0.23 | 0.13 | 0.00 | 0.00 | 0.07 | 0.00 |
| O-020 | 0.00 | 0.01 | 12.51 | 0.95 | 0.08 | 0.13 | 3.40 | 73.70 | 7.60  | 0.45 | 0.68 | 0.25 | 0.14 | 0.00 | 0.00 | 0.07 | 0.00 |
| O-026 | 0.00 | 0.01 | 11.03 | 0.89 | 0.08 | 0.12 | 3.09 | 76.00 | 7.17  | 0.44 | 0.68 | 0.29 | 0.13 | 0.00 | 0.01 | 0.06 | 0.00 |
| O-028 | 0.00 | 0.01 | 10.26 | 0.77 | 0.07 | 0.10 | 3.46 | 79.07 | 4.85  | 0.40 | 0.62 | 0.24 | 0.10 | 0.00 | 0.00 | 0.05 | 0.00 |
| O-030 | 0.00 | 0.01 | 11.12 | 0.96 | 0.08 | 0.16 | 2.80 | 75.74 | 7.47  | 0.46 | 0.68 | 0.30 | 0.14 | 0.00 | 0.00 | 0.07 | 0.00 |
| O-031 | 0.00 | 0.01 | 11.36 | 1.00 | 0.06 | 0.11 | 3.38 | 75.02 | 7.43  | 0.43 | 0.71 | 0.26 | 0.15 | 0.00 | 0.00 | 0.07 | 0.00 |
| O-032 | 0.00 | 0.01 | 11.95 | 1.06 | 0.08 | 0.13 | 3.19 | 73.45 | 8.50  | 0.46 | 0.67 | 0.26 | 0.16 | 0.00 | 0.00 | 0.08 | 0.00 |
| O-036 | 0.00 | 0.01 | 11.27 | 0.96 | 0.06 | 0.11 | 3.08 | 76.05 | 6.83  | 0.45 | 0.70 | 0.27 | 0.14 | 0.00 | 0.00 | 0.07 | 0.00 |
| O-063 | 0.00 | 0.01 | 12.05 | 1.21 | 0.08 | 0.12 | 3.28 | 71.67 | 9.96  | 0.48 | 0.67 | 0.25 | 0.14 | 0.00 | 0.00 | 0.08 | 0.00 |
| O-064 | 0.00 | 0.01 | 12.03 | 1.17 | 0.06 | 0.11 | 3.39 | 73.61 | 8.02  | 0.45 | 0.69 | 0.24 | 0.14 | 0.00 | 0.00 | 0.07 | 0.00 |
| O-066 | 0.00 | 0.02 | 13.33 | 1.38 | 0.09 | 0.14 | 3.04 | 69.82 | 10.53 | 0.48 | 0.68 | 0.25 | 0.15 | 0.00 | 0.00 | 0.10 | 0.00 |
| O-075 | 0.00 | 0.02 | 10.90 | 0.85 | 0.07 | 0.11 | 3.21 | 77.23 | 6.10  | 0.41 | 0.64 | 0.25 | 0.15 | 0.00 | 0.00 | 0.07 | 0.00 |
| O-076 | 0.00 | 0.01 | 13.11 | 1.40 | 0.08 | 0.13 | 3.05 | 70.42 | 10.18 | 0.46 | 0.70 | 0.25 | 0.14 | 0.00 | 0.00 | 0.08 | 0.00 |
| O-077 | 0.00 | 0.01 | 12.07 | 1.19 | 0.07 | 0.11 | 3.24 | 72.23 | 9.49  | 0.45 | 0.70 | 0.25 | 0.12 | 0.00 | 0.00 | 0.07 | 0.00 |
| O-078 | 0.00 | 0.01 | 12.88 | 1.29 | 0.07 | 0.13 | 2.98 | 70.87 | 10.15 | 0.47 | 0.67 | 0.26 | 0.14 | 0.00 | 0.00 | 0.08 | 0.00 |
| O-    | 0.00 | 0.01 | 11.29 | 1.00 | 0.06 | 0.10 | 3.37 | 75.31 | 7.34  | 0.45 | 0.63 | 0.25 | 0.12 | 0.00 | 0.00 | 0.07 | 0.00 |

|       |      |      |       |      |      |      |      |       |       |      |      |      |      |      |      |      |      |
|-------|------|------|-------|------|------|------|------|-------|-------|------|------|------|------|------|------|------|------|
| 079   |      |      |       |      |      |      |      |       |       |      |      |      |      |      |      |      |      |
| P-002 | 0.00 | 0.02 | 11.95 | 1.02 | 0.08 | 0.14 | 2.99 | 71.01 | 10.84 | 0.49 | 0.76 | 0.36 | 0.22 | 0.01 | 0.00 | 0.11 | 0.00 |
| P-038 | 0.00 | 0.02 | 11.42 | 0.97 | 0.07 | 0.11 | 2.86 | 70.31 | 12.25 | 0.50 | 0.81 | 0.37 | 0.20 | 0.01 | 0.00 | 0.11 | 0.00 |
| P-065 | 0.00 | 0.02 | 10.83 | 0.86 | 0.07 | 0.11 | 2.81 | 71.96 | 11.36 | 0.49 | 0.82 | 0.36 | 0.20 | 0.00 | 0.01 | 0.10 | 0.00 |
| P-074 | 0.00 | 0.01 | 11.84 | 1.02 | 0.08 | 0.14 | 2.86 | 71.32 | 10.85 | 0.49 | 0.72 | 0.33 | 0.22 | 0.00 | 0.00 | 0.11 | 0.00 |
